# Supplementary material for: Polyethylene glycol clicked Co(ii) Schiff base and its catalytic activity for the oxidative dehydrogenation of secondary amines
Source: Royal Society of Chemistry journal article supplement (doi:10.1039/c0ob01163k), 2011-01-01

## Supporting Information

### Polyethylene glycol clicked Co(II) Schiff base and its catalytic activity for the oxidative dehydrogenation of secondary amines

Praveen K. Khatri, Suman L. Jain,\* L. N. Sivakumar K. and Bir Sain

**Benzaldehyde (Table 1: entry 1):**

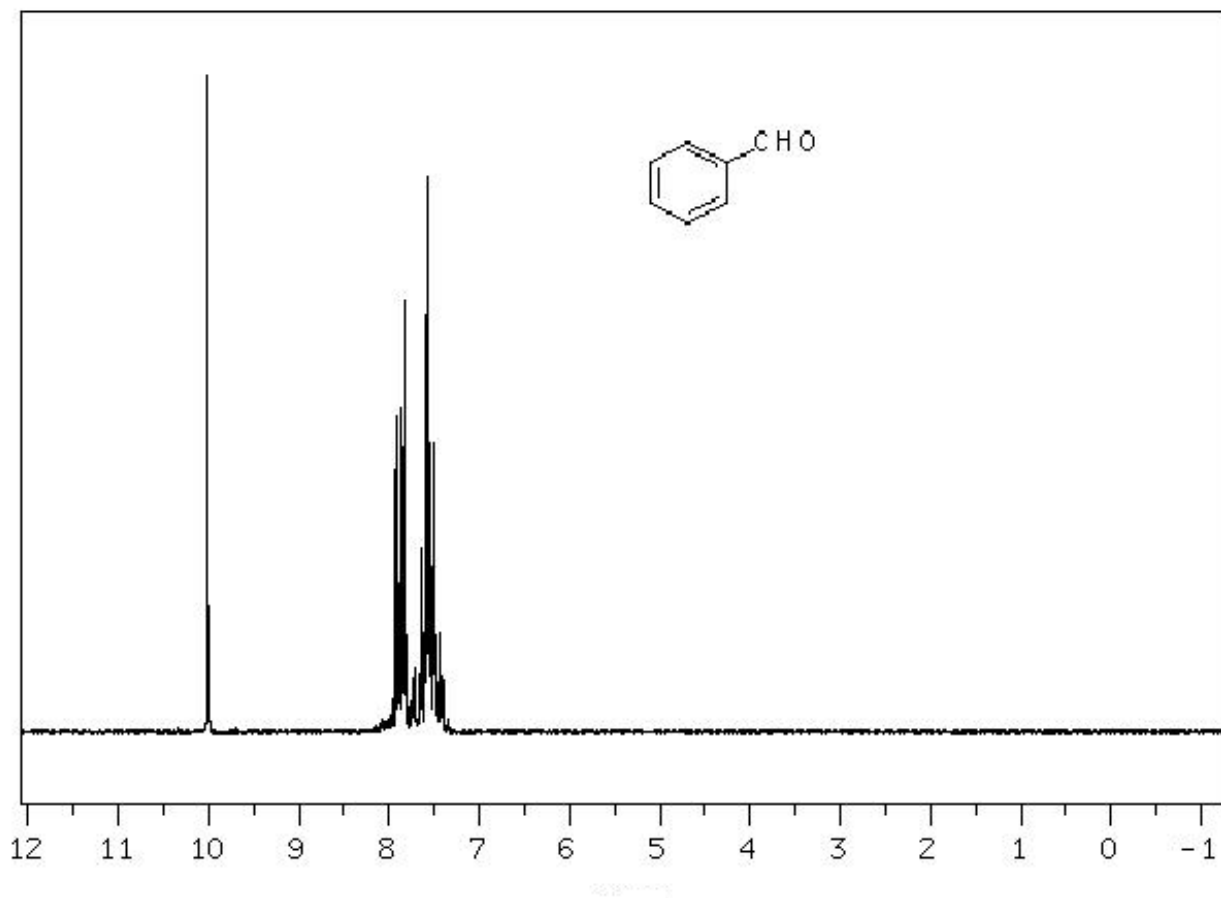

**Benzylidene benzylamine (Table 1, entry 2):**

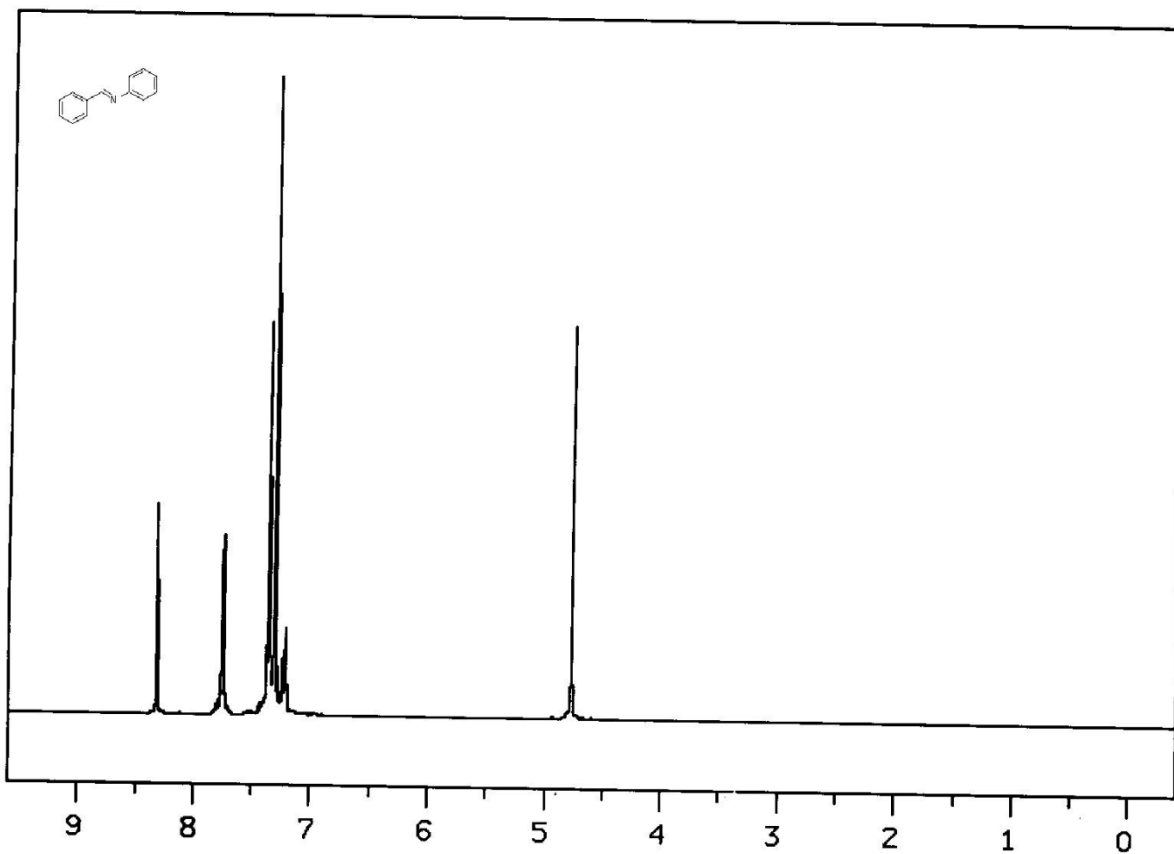

**Benzylidene-*tert*-butylamine (Table 1, entry 3)**

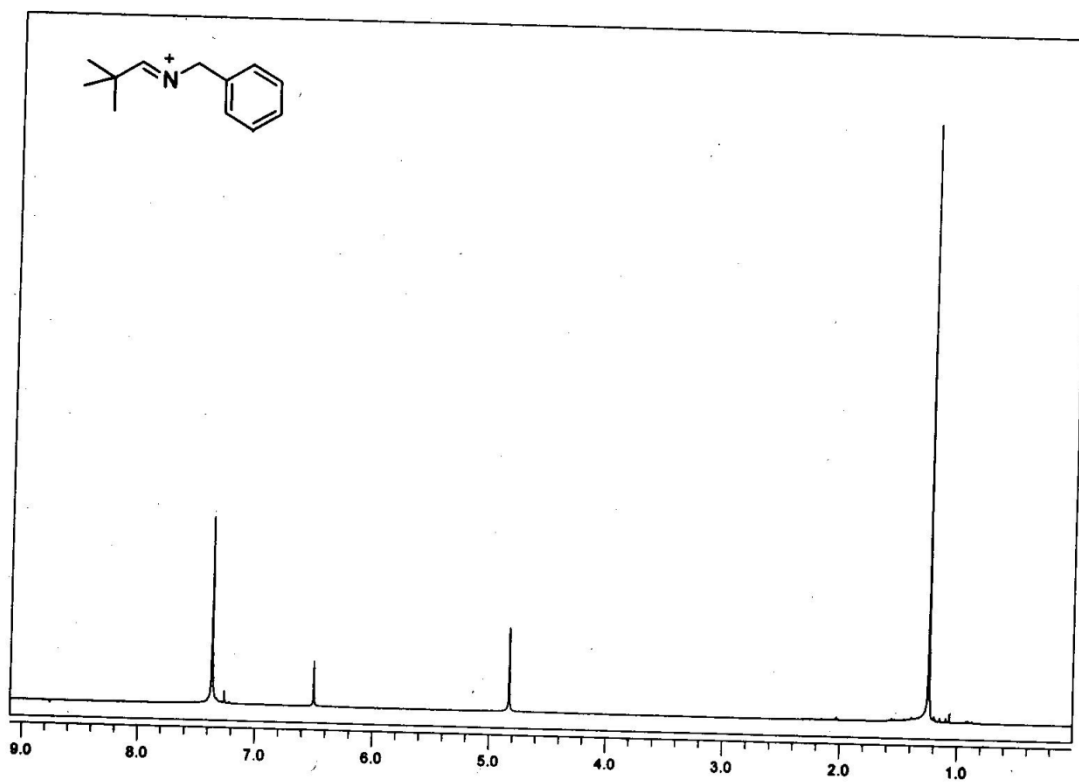

**Cyclohexanone (Table 1, entry  
4)**

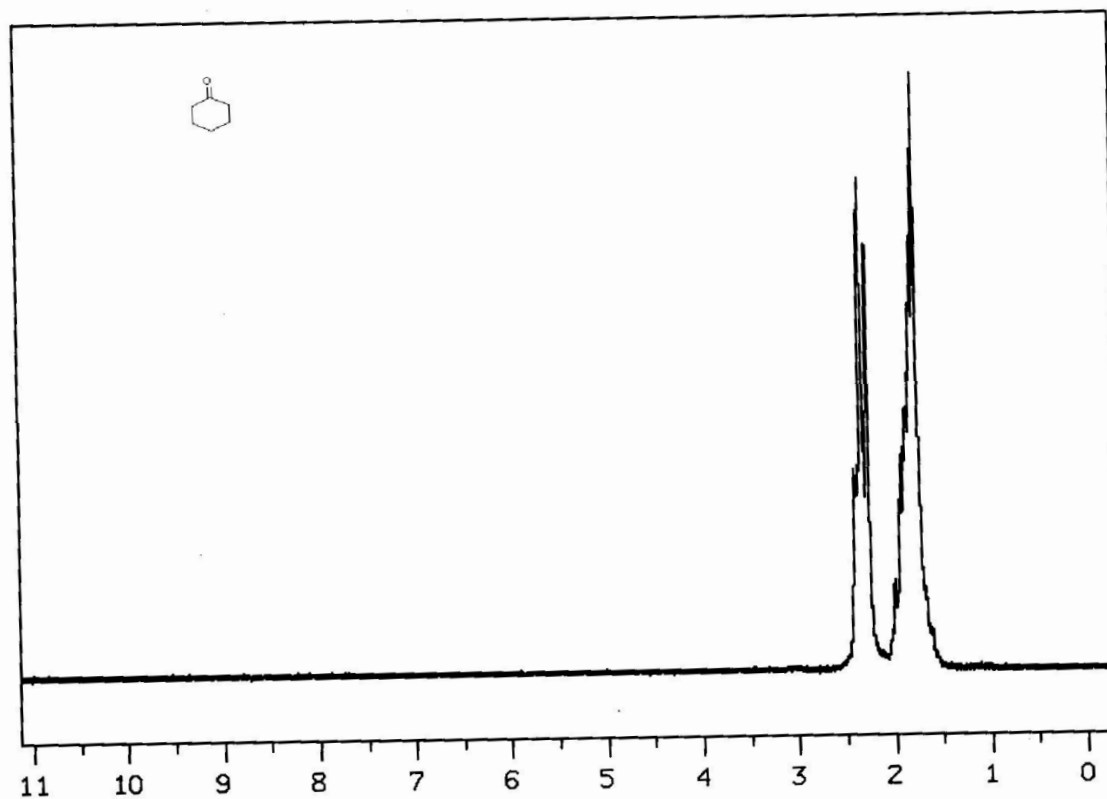

**Butyraldehyde (Table 1, entry 5):**

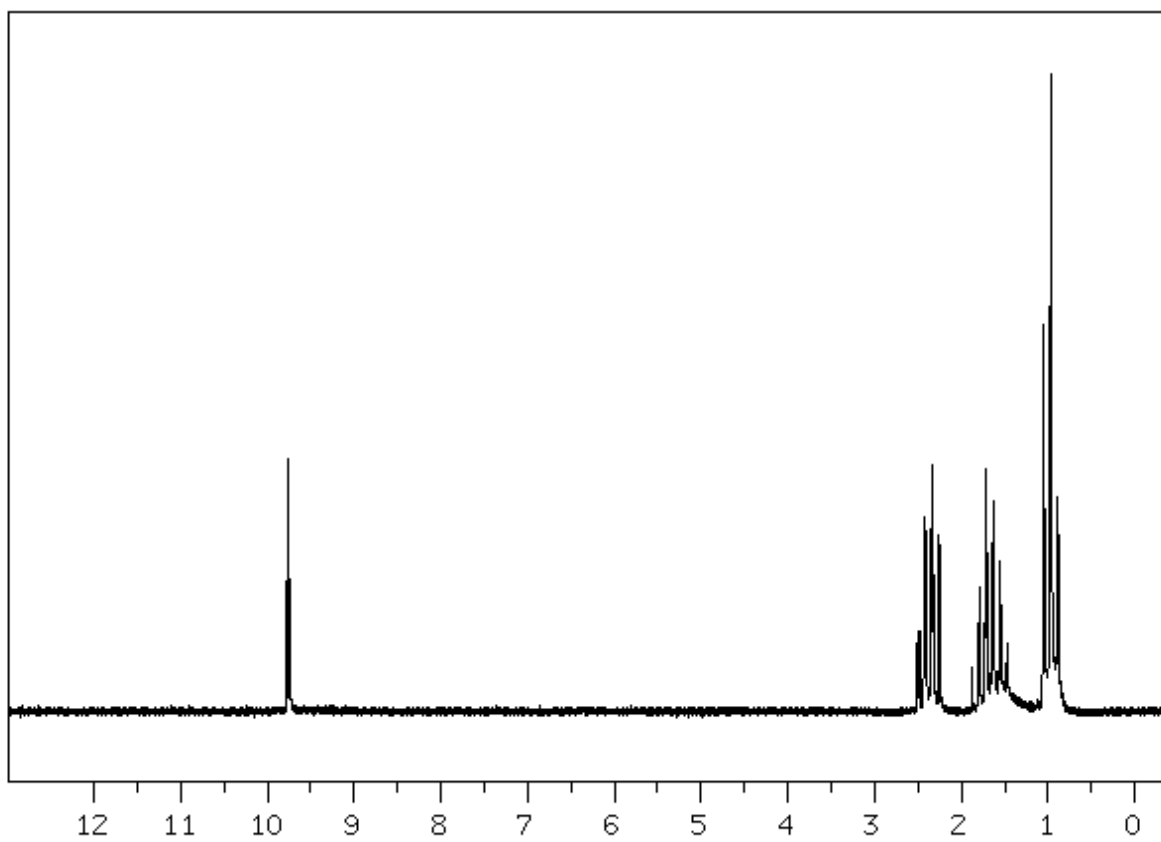

***n*-Butylidene benzylamine (Table 1, entry 6):**

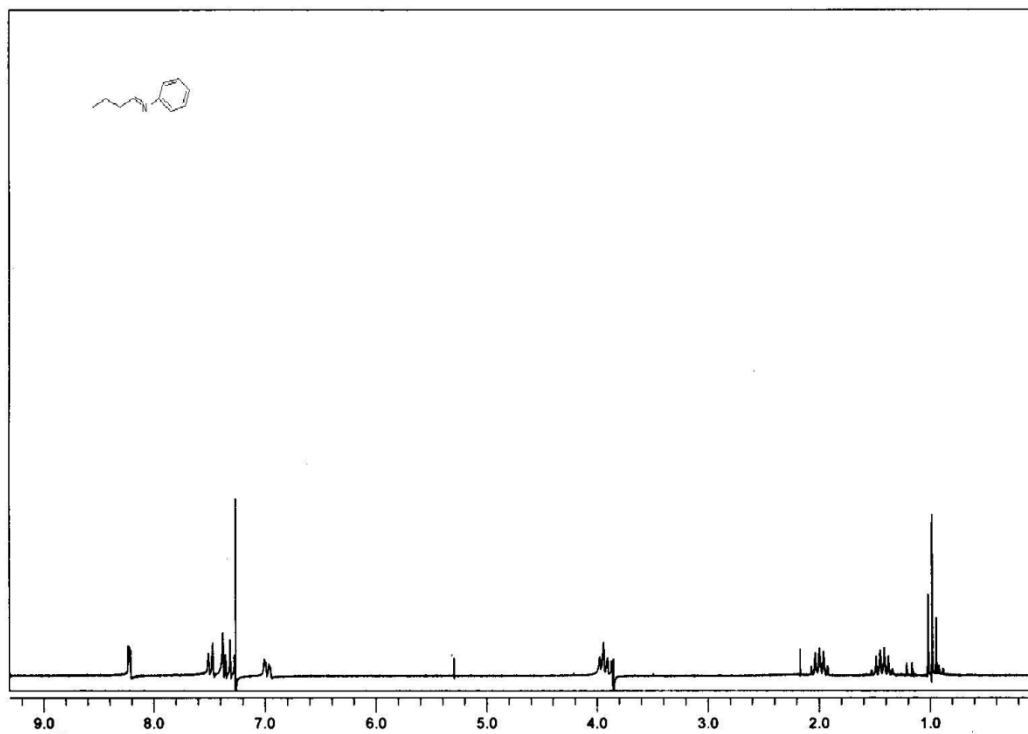



**3,4-Dihydroisoquinoline (Table 1, entry 7):**

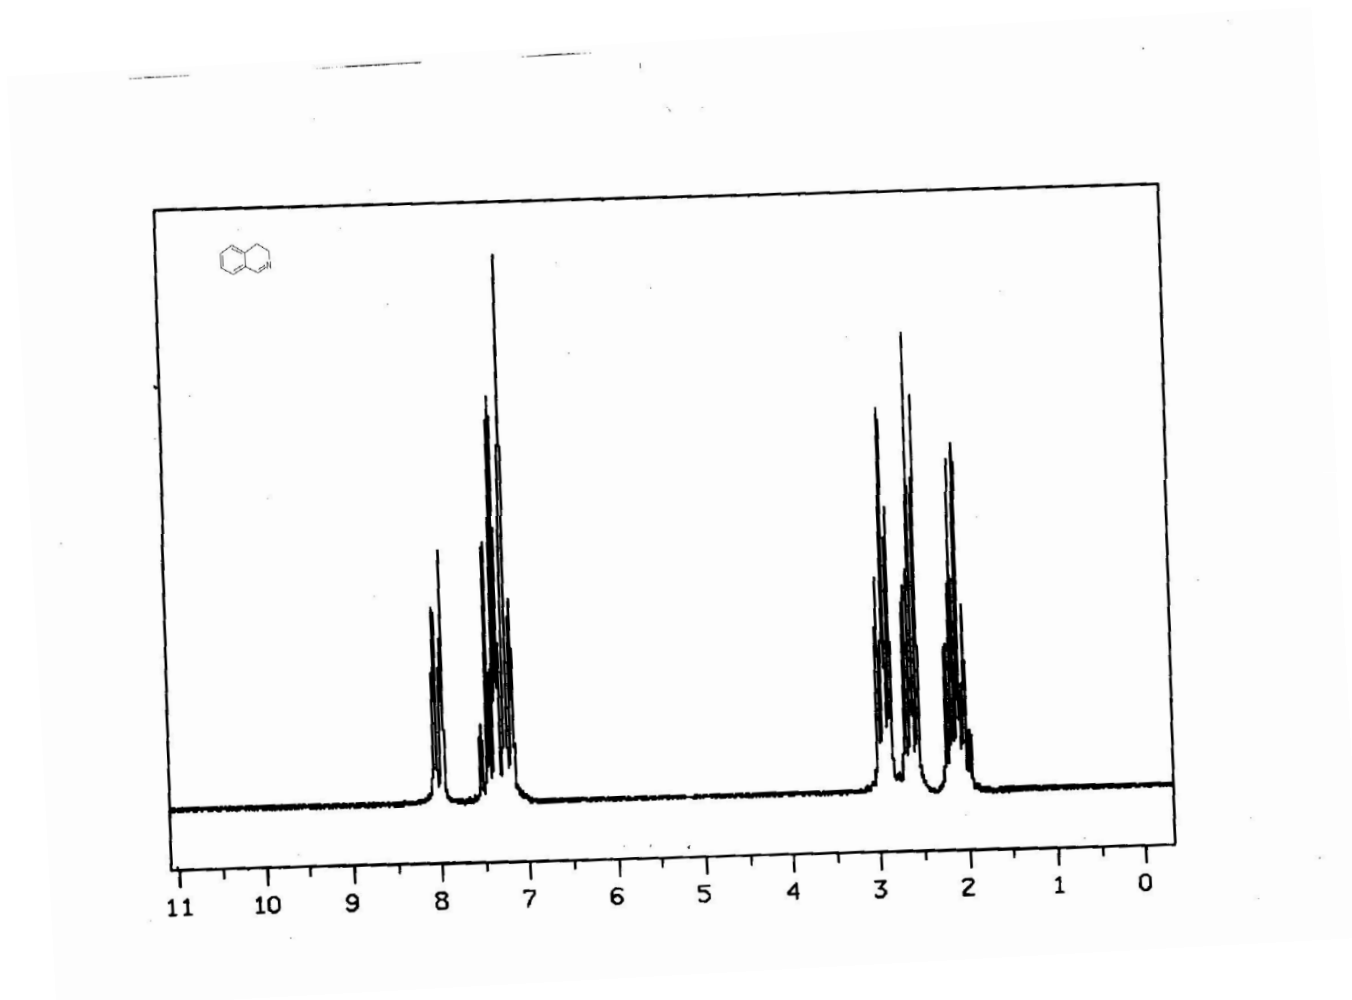

Supplement: c0ob01163k.pdf [file c0ob01163k.pdf]
